1 **Title:** Influence of Incorrect Documentation of Initial Cardiac Rhythm in Survivors of Out of  
2 Hospital Cardiac Arrest

3  
4 **Authors and Affiliations:** Sant Kumar, MD<sup>a</sup>; Max Hockstein, MD<sup>b</sup>; Alexander I. Papolos<sup>bc</sup>;  
5 Mithun Devraj, MD<sup>d</sup>; Nauman Khalid, MD<sup>e</sup>; Michael J. Lipinski, MD, PhD<sup>f</sup>; Benjamin B.  
6 Kenigsberg<sup>bc</sup>

7  
8 <sup>a</sup>MedStar Georgetown University Hospital, Washington, DC; <sup>b</sup>Department of Critical Care,  
9 MedStar Washington Hospital Center, Washington, DC; <sup>c</sup>Division of Cardiology, MedStar  
10 Washington Hospital Center, Washington, DC; <sup>d</sup>The George Washington University Heart &  
11 Vascular Institute, Washington, DC; <sup>e</sup>St. Francis Medical Center, Monroe, LA <sup>f</sup>Cardiovascular  
12 Associates of Charlottesville, Charlottesville, VA

13  
14 **Corresponding Author:**

15 Benjamin B. Kenigsberg, MD FACC  
16 Department of Critical Care and Division of Cardiology  
17 MedStar Washington Hospital Center  
18 110 Irving Street NW, Washington, DC 20010  
19 [Benjamin.B.Kenigsberg@medstar.net](mailto:Benjamin.B.Kenigsberg@medstar.net)

20  
21 **Short Title:** Influence of Discordant Documentation on Catheterization

22  
23 **Word Count:** 4306

24  
25  
26

27 **ABSTRACT**

28 **Background:** In-hospital management of out-of-hospital cardiac arrest (OHCA) is heavily  
29 influenced by the initial rhythm (shockable vs. non-shockable). The prevalence of discordance  
30 between initial rhythm determination reported by emergency medical services (EMS) versus  
31 hospital teams is not well described. It is unclear whether such documentation discrepancies in  
32 OHCA influence inpatient clinical care including subsequent left heart catheterization (LHC).  
33 We hypothesized that discordance between EMS and hospital team documentation of OHCA  
34 initial rhythm was common and associated with differences in LHC frequency.

35 **Methods:** This was a retrospective, single-center study. OHCA patients from the Cardiac Arrest  
36 Registry to Enhance Survival (CARES) hospital database were linked by demographic and arrest  
37 history to OHCA patients identified by inpatient hospital billing codes from 2009 to 2017.  
38 Patients who expired within 24 hours of hospital presentation were excluded. Hospital  
39 documentation of OHCA initial rhythm and occurrence of LHC were manually reviewed. The  
40 relationship between EMS versus hospital team documentation of OHCA initial rhythm and  
41 occurrence of LHC were assessed by relative risk ratios with 95% confidence intervals.

42 **Results:** Out of 164 patients for analysis, 140 (85.4%) had concordant EMS and hospital  
43 documentation of OHCA initial rhythm. For OHCA with an EMS-documented shockable  
44 rhythm, the relative risk of LHC when hospital-documented concordant shockable vs. discordant  
45 non-shockable rhythm was 2.12 (95% RR CI: 0.76-5.93). For OHCA with an EMS-documented  
46 non-shockable rhythm, the relative risk of LHC when hospital-documented concordant non-  
47 shockable vs discordant shockable rhythm was 0.19 (95% CI: 0.05-0.69).

48 **Conclusions:** In patients with OHCA, discrepancy between EMS and hospital team  
49 documentation of the initial arrest rhythm is prevalent. This discrepancy may influence the  
50 incidence of LHC. Further research is needed to understand the clinical impact of discrepancies  
51 in rhythm communication between EMS and hospital teams.

52

53 **Keywords:** Cardiac arrest; Shockable rhythm; Non-shockable rhythm; Catheterization

54

55

56 **Abbreviations:**

57 OHCA, Out of hospital cardiac arrest

58 CA, Coronary angiography

59 EMS, Emergency medical services

60 CARES, Cardiac Arrest Registry to Enhance Survival

61

62

63

64

65

66

67

68

69

70

71

72

73

74

75

76

77

78

79

## 80 INTRODUCTION

81 Initial cardiac rhythm strongly influences outcome after out of hospital cardiac arrest  
82 (OHCA). OHCA due to asystole or pulseless electrical activity, also referred to as non-shockable  
83 rhythms, is associated with decreased survival. This is attributed, in part, to more frequent non-  
84 cardiac etiologies to the arrest.[1],[2] Alternatively, OHCA due to ventricular tachycardia or  
85 ventricular fibrillation, also referred to as shockable rhythms given the required intervention with  
86 defibrillation, is associated with higher survival and a greater incidence of intervenable cardiac  
87 arrest etiologies such as an acute coronary ischemia.[3] As a result, many patients who  
88 experience OHCA, particularly from shockable rhythms, are referred for coronary  
89 angiography.[3]

90 However, OHCA events occur in an unpredictable manner and in unpredictable locations,  
91 and thus, direct assessment of the initial cardiac rhythm may be unavailable to the hospital-based  
92 medical team.[4] Emergency medical services (EMS) are typically the first medical responders  
93 to an OHCA and have directly assessed the initial cardiac rhythm, occasionally from an  
94 automated external defibrillator (AED). The accuracy of communication of OHCA initial  
95 rhythm from EMS to hospital teams is unknown. Additionally, it is also unknown whether  
96 discrepancies in OHCA initial rhythm documentation between EMS and hospital records are  
97 associated with different frequencies of coronary angiography.

98 The aim of this study was to assess the frequency of concordance and discordance  
99 between EMS and hospital team documentation of initial cardiac rhythm in OHCA. We  
100 additionally sought to characterize associated clinical management differences in the disparate  
101 groups.

102

## 103 METHODS

### 104 Source of Data and Study Patients

105 This was a retrospective, single-center study in which we abstracted data from our  
106 electronic health record using billing codes for cardiac arrest from March 2009 to March 2017.  
107 Abstracted data included demographics, initial OHCA rhythm from admission documentation,  
108 and incidence of invasive cardiac procedures (including left heart catheterization, right heart

109 catheterization and percutaneous coronary intervention). Right heart catheterization, or  
110 pulmonary artery catheter placement, was to assess cardiogenic shock. Patients were then  
111 associated with their entries in the Cardiac Arrest Registry to Enhance Survival (CARES)  
112 registry based on age, date of presentation, and gender. The CARES registry is an online-based  
113 data management system in which participating 911 centers, first responders, emergency medical  
114 services (EMS) and hospitals enter local data to develop standard outcome measures for OHCA  
115 and to improve quality of care. The CARES database lists six options for the initial rhythm  
116 recorded by paramedics: "ventricular fibrillation," "ventricular tachycardia," "unknown  
117 shockable rhythm," "asystole," "idioventricular/PEA," and "unknown unshockable rhythm." [5]  
118 This determination by the paramedics was utilized to identify the EMS documented binary  
119 shockable (ventricular fibrillation, ventricular tachycardia and unknown shockable rhythm) and  
120 non-shockable (asystole, idioventricular/PEA and unknown unshockable rhythm) rhythm  
121 cohorts. When a cross-referenced record was not clear based on basic demographic data alone,  
122 available OHCA arrest details including location of the arrest were manually reviewed based on  
123 date of OHCA. To ensure consistent admission documentation was available, patients who  
124 expired within 24 hours of hospital presentation were excluded from analysis (**Figure 1**). When  
125 the hospital team recorded that patients had both shockable and non-shockable rhythms, we  
126 classified the initial rhythm as shockable. Additionally, the initial hospital ECG of each patient  
127 was manually reviewed by a study physician for evidence of ischemia; however, the initial  
128 rhythm strip from the arrest was not available for retrospective review and rhythm verification.

129 While our institutional practice has evolved over time with developing data, we generally  
130 adhere to the current Society for Cardiovascular Angiography and Interventions (SCAI)  
131 recommendations for managing patients with OHCA. [6] Specifically, our typical approach  
132 involves immediate LHC with coronary angiography and primary percutaneous coronary  
133 intervention (PCI) as indicated for patients with either intact neurological function or comatose  
134 patients with favorable features for good neurological recovery, who have ST-segment elevation  
135 myocardial infarction (STEMI) on their initial ECG or evident ischemia mediated cardiogenic  
136 shock after the return of spontaneous circulation (ROSC). We consider LHC urgently for patients  
137 with shockable initial OHCA rhythms and/or non-ST-segment elevation myocardial infarctions  
138 (NSTEMI), although over time have generally prioritized awaiting neurological recovery before  
139 proceeding with LHC. We consider LHC on a case-by-case basis in patients with OHCA and

140 non-shockable rhythms, considering post ROSC ECG, cardiac biomarkers, clinical status and  
141 medical histories.[6] The study protocol was approved by the IRB at MedStar Washington  
142 Hospital Center.

### 143 **Outcome Definitions**

#### 144 *Concordant Documentation*

145 If hospital documentation of the initial cardiac rhythm in patients with OHCA matched  
146 the rhythm documented by EMS, we defined this as “concordant.” For example, if a patient with  
147 OHCA was noted to have a shockable rhythm (ventricular tachycardia, ventricular fibrillation or  
148 unknown shockable rhythm) by EMS, and the hospital team noted the initial out of hospital  
149 arrest rhythm to be shockable (e.g. ventricular tachycardia or ventricular fibrillation) in its  
150 documentation as well, then we defined this as concordant documentation (**Figure 1**).

#### 151 *Discordant Documentation*

152 If hospital documentation of the initial cardiac rhythm in patients with OHCA did not  
153 match the rhythm documented by EMS, we defined this as “discordant.” For example, if a  
154 patient with OHCA was noted to have an initial shockable rhythm by EMS, and the hospital  
155 team noted the initial hospital rhythm to be non-shockable (e.g. asystole or pulseless electrical  
156 activity), then we defined this as discordant documentation (**Figure 1**).

### 157 **Statistical Analysis**

158 Descriptive statistics included the comparison of baseline characteristics between patients  
159 whose initial OHCA rhythm was documented by emergency medical services as shockable or  
160 non-shockable and by the hospital team as shockable or non-shockable. For outcome analyses,  
161 we examined concordance and discordance between EMS and in-hospital documentation of  
162 initial OHCA rhythm and the subsequent association with cardiac procedure incidence by  
163 calculating relative risk ratios. To investigate the impact of the initial ECG on hospital arrival,  
164 we computed the relative risk ratios for patients who received left or right heart catheterization,  
165 depending on whether they had ischemic changes on the hospital arrival ECG. We analyzed the  
166 data for both concordant and discordant documentation. Data analyses were performed with the  
167 use of RStudio version 4.2.1 (RStudio: Integrated Development for R. RStudio, PBC, Boston,  
168 MA URL <http://www.rstudio.com/>).

169

## 170 **RESULTS**

### 171 **Baseline Characteristics**

172 Out of 1051 CARES patients, 798 (75.9%) were associated and cross-referenced with  
173 hospital patient records. Within 24 hours of hospital arrival, 631 patients expired, leaving 167  
174 patients for analysis. Of these 167 patients only 3 of these patients did not have hospital  
175 documentation about the initial OHCA rhythm, leaving 164 for final analysis (20.6% of the  
176 cross-referenced registry) for analysis (**Figure 1**). Baseline characteristics for these patients are  
177 displayed in **Table 1**. These patients had a mean age of 62.7 years. Of these 164 patients, 73  
178 (44.5%) were female and 123 (75.0%) were African American. The utilization of an automated  
179 external defibrillator and a mechanical CPR support device as per EMS entry into the CARES  
180 registry are listed in **Table 3**.

### 181 **Baseline Characteristics and Outcomes by Initially Documented EMS Rhythm**

182 Out of 164 patients included in our analysis, 46 (28.0%) patients' initial cardiac rhythm  
183 was documented as shockable by EMS, while 118 (72.0%) patients' initial cardiac rhythm was  
184 documented as non-shockable by EMS. Baseline characteristics for these patients are shown in  
185 **Table 2**. Of those patients whose initial cardiac rhythm was documented as shockable by EMS,  
186 21 (45.7%) patients underwent left heart catheterization, and 11 (23.9%) patients underwent right  
187 heart catheterization. Of patients whose initial cardiac rhythm was documented as non-shockable  
188 by EMS, 8 (6.8%) patients underwent left heart catheterization, and 4 (3.4%) patients underwent  
189 right heart catheterization.

### 190 **Influence of Concordance and Discordance on Outcomes by Initially Documented EMS** 191 **Rhythm**

192 The initial cardiac rhythm of 34 (20.7% of total analysis cohort) patients was  
193 concordantly documented as shockable by both EMS and the hospital team. However, for 12  
194 (7.3% of total analysis cohort) patients, EMS documented the initial cardiac rhythm as  
195 shockable, while the hospital team documented the initial cardiac rhythm as non-shockable  
196 (**Table 1**). Thus, 26.1% of patients documented as having a shockable OHCA initial rhythm by

197 EMS were discordantly documented as having a non-shockable OHCA initial rhythm in the  
198 inpatient documentation.

199 For patients whose initial cardiac rhythm was documented as shockable by EMS, the  
200 relative risk of left heart catheterization was 2.12 (95% RR CI: 0.76-5.93) when comparing  
201 hospital-documented shockable OHCA initial rhythm (i.e., “concordant”) versus hospital  
202 documented non-shockable OHCA initial rhythm (i.e., “discordant”) (**Figure 1**). Similarly, the  
203 relative risk of right heart catheterization was 1.59 (95% CI: 0.40-6.33) between the shockable  
204 OHCA concordant and discordant groups. (**Table 4**).

205 The initial cardiac rhythm of 106 (64.6% of total analysis cohort) patients was  
206 concordantly documented as non-shockable by both EMS and the hospital team. However, for 12  
207 (7.3% of total analysis cohort) patients, EMS documented the initial cardiac rhythm as non-  
208 shockable, while the hospital team documented the initial cardiac rhythm as shockable (**Table 1**).  
209 Thus, 10.2% of patients documented as having a non-shockable OHCA initial rhythm by EMS  
210 were discordantly documented as having a shockable OHCA initial rhythm in the inpatient  
211 documentation.

212 For those patients whose initial cardiac rhythm was documented as non-shockable by  
213 EMS, the relative risk of left heart catheterization was 0.19 (95% CI: 0.05-0.69) when comparing  
214 hospital-documented non-shockable OHCA initial rhythm (i.e. “concordant”) and hospital  
215 documented shockable OHCA initial rhythm (i.e. “discordant”) (**Figure 1**). The relative risk of  
216 right heart catheterization was 0.34 (95% CI: 0.04-3.01) between the non-shockable OHCA  
217 concordant and discordant groups (**Table 4**).

218 Finally, patients with ischemic changes on their arrival hospital ECG had a 2.48 (95% CI:  
219 1.20-5.12) times higher risk of undergoing left heart catheterization compared to those without  
220 such changes. These findings are summarized in **Table 5**.

221

## 222 **DISCUSSION**

223 To our knowledge, we report the first analysis of the frequency and potential impact of  
224 discrepancies regarding the documentation of OHCA initial cardiac rhythm between EMS and  
225 the hospital team. In our analysis, 14.6% of OHCA patients surviving at least 24 hours after



226 hospital presentation had discordance in the documentation of the initial cardiac arrest rhythm.  
227 While the reasons for the documentation discrepancy cannot be determined from our analysis,  
228 the presence of any communication gap between medical providers in the chain of survival may  
229 affect patient management and represents an opportunity for future work. We identified a  
230 potential association between initial cardiac rhythm discordance between EMS and hospital  
231 documentation with the relative frequency of invasive cardiac procedures after OHCA. The  
232 frequency of LHC was highest when there was agreement of a shockable rhythm and lowest  
233 when there was agreement of a non-shockable rhythm (52.9% and 4.7%, respectively). The  
234 frequency of LHC when there was hospital discordance in rhythm determination in cases of EMS  
235 determined shockable and non-shockable rhythm was numerically intermediate (25% and 25%,  
236 respectively) between the concordant results. In our primary analysis, these differences were  
237 only statistically significant for the EMS determined non-shockable rhythm patients. In both the  
238 EMS shockable and non-shockable OHCA cohorts, hospital documentation of a shockable  
239 OHCA initial rhythm was associated with a numerically higher relative risk of LHC. Such an  
240 association is clinically plausible as the inpatient clinical management after OHCA often relies  
241 on the initial cardiac rhythm.

242 Over the past several years survival rates for patients who experience OHCA have  
243 improved.[7] This progress in OHCA survival is multifactorial, but may be attributed to a  
244 combination of improvement in cardiopulmonary resuscitation (CPR) quality, early recognition  
245 of cardiac arrest, and the use of automated external defibrillators.[8],[9] Despite improvement in  
246 outcomes for patients who sustain OHCA, mortality remains high especially those who are  
247 reported to have non-shockable rhythms, with survival rates as low as 7%.[10],[11] Various  
248 hypotheses have been proposed for the morbidity and mortality associated with OHCA.

249 There are important regional variations in outcomes for patients with OHCA, [12],[13]  
250 in part attributed to care practice differences both during the pre-hospital and in-hospital phases  
251 of management.[12] The rate of rhythm disagreement in our study (14.6%) was noticeably  
252 higher compared to a population from the North Holland province of the Netherlands studied by  
253 Homma et al (4%), likely predominantly due to regional differences in first responder and EMS  
254 systems.[15], In the Homma et al study, EMS paramedics routinely send manual defibrillator  
255 ECG tracings to the study centers or, instead, when an AED was used the study personnel  
256 directly sent AED information to hospital teams if a shockable rhythm was detected.[16] This

257 alerted physicians in that study region to the importance of AED information for patient  
258 outcomes in cases of OHCA. Neither of these robust data transmission practices exist for OHCA  
259 response in the Washington D.C. metropolitan population we studied. Additionally, regarding  
260 the pre-hospital setting, poorly economically resourced and more rural areas have been  
261 associated with worse outcomes in patients with OHCA.[14]

262         Regarding the in-hospital management regional variation, decision to proceed with  
263 coronary angiography is influenced by time from collapse to return of spontaneous circulation  
264 (ROSC) and other such predictive features for neurological recovery at some centers and not  
265 others.[6] Within medical centers, different specialists including anesthesiologists, cardiologists,  
266 emergency physicians, and intensivists may coordinate care of these patients leading to  
267 significant practice heterogeneity.[12] In addition to these factors, other areas of inconsistency  
268 such as the accuracy of documentation need to be identified and improved to further enhance  
269 outcomes.[17],[18] A solution to consider is electronically transferring the OHCA ECG directly  
270 to the hospital, making the prehospital ECG available in the patient's electronic health records.  
271 Our report showed that there is important variation in the initial cardiac rhythm documentation,  
272 which emphasizes the need for accurate documentation and clear communication among  
273 different medical providers.

274         Improvements in communication practices during the transition of care from EMS to  
275 hospital teams, and among different hospital teams, is essential for better management of patients  
276 with OHCA.

277

## 278 **LIMITATIONS**

279         There are numerous limitations to our study. Our cohort is both small and from a single  
280 institution, limiting the external validity of our findings. While the relative risk of documentation  
281 discrepancy on LHC incidence was significant for the EMS non-shockable rhythm cohort, the  
282 relative risk was not significant for the EMS shockable rhythm cohort. This difference may be  
283 due to small sample size given the wide confidence intervals in the smaller shockable rhythm  
284 cohort. Additionally, we were unable to associate all local OHCA patients from the CARES  
285 registry with hospital records using billing codes, and thus cannot exclude a significant impact of  
286 selection bias in our analysis cohort. However, if we were to assume that all 253 unmatched

287 CARES registry patients either had concordant or discordant initial cardiac rhythm  
288 documentation, respectively, and had a similar rate of initial survival after hospital presentation  
289 (20.9%), the potential range for documentation concordance would be between 88.9% and 64.5%  
290 instead of the 85.46% in our analysis. Despite such exclusions, the demonstrated discrepancies  
291 suggest that discordance between EMS and hospital documentation remains prevalent. In  
292 addition, while the presence versus absence of ischemic ECG changes on initial hospital arrival  
293 ECG did associate with receiving left heart catheterization, the degree of the association was  
294 similar to initial rhythm concordance versus discordance. Another important limitation of our  
295 analysis is that we cannot independently verify the prehospital rhythm determination as pre-  
296 hospital rhythm strips were unavailable for review in our electronic medical record. However,  
297 available AED utilization data does support EMS documentation accuracy as only 1 (0.85%)  
298 patient in the EMS-documented non-shockable rhythm group with an AED applied received  
299 defibrillation and, similarly, all patients in the EMS-documented shockable rhythm group with  
300 an AED applied received defibrillation (Table 3).

301 Lastly, we acknowledge that various communities have varying approaches to and  
302 available resources for handling OHCA. Our study was conducted specifically focusing on  
303 individuals in our local community who had ready access to coronary angiography as determined  
304 to be clinically indicated.

## 305 **CONCLUSION**

306 Discrepancies between EMS and hospital documentation regarding initial rhythm in out  
307 of hospital cardiac arrest is common. Such discrepancies may be associated with the relative risk  
308 of performance of invasive cardiac procedures for patients after OHCA. Dedicated investigation  
309 is required to understand how to improve both communication and documentation by medical  
310 staff managing OHCA patients.

311

312

313

314

315 **Funding:** This research did not receive any specific grant from funding agencies in the public,  
316 commercial, or not-for-profit sectors.

317

318 **Disclosures:** The authors declare no conflict of interest.

319

320

321

322

323

324

325

326

327

328

329

330

331

332

333

334

335

336

337

338

339

340

341 **REFERENCES**

342

- 343 [1] T. Väyrynen, M. Kuisma, T. Määttä, and J. Boyd, “Medical futility in asystolic out-of-  
344 hospital cardiac arrest,” *Acta Anaesthesiologica Scandinavica*, vol. 52, no. 1, pp. 81–87,  
345 2008, doi: 10.1111/j.1399-6576.2007.01461.x.
- 346 [2] J. Engdahl, A. Bång, J. Lindqvist, and J. Herlitz, “Factors affecting short- and long-term  
347 prognosis among 1069 patients with out-of-hospital cardiac arrest and pulseless electrical  
348 activity,” *Resuscitation*, vol. 51, no. 1, pp. 17–25, Oct. 2001, doi: 10.1016/S0300-  
349 9572(01)00377-X.
- 350 [3] S. Desch *et al.*, “Angiography after Out-of-Hospital Cardiac Arrest without ST-Segment  
351 Elevation,” *New England Journal of Medicine*, vol. 0, no. 0, p. null, Aug. 2021, doi:  
352 10.1056/NEJMoa2101909.
- 353 [4] K. B. Kern, “Optimal Treatment of Patients Surviving Out-of-Hospital Cardiac Arrest,”  
354 *JACC: Cardiovascular Interventions*, vol. 5, no. 6, pp. 597–605, Jun. 2012, doi:  
355 10.1016/j.jcin.2012.01.017.
- 356 [5] B. McNally, A. Stokes, A. Crouch, and A. L. Kellermann, “CARES: Cardiac Arrest Registry  
357 to Enhance Survival,” *Annals of Emergency Medicine*, vol. 54, no. 5, pp. 674–683.e2, Nov.  
358 2009, doi: 10.1016/j.annemergmed.2009.03.018.
- 359 [6] A. Lotfi *et al.*, “SCAI expert consensus statement on out of hospital cardiac arrest,”  
360 *Catheterization and Cardiovascular Interventions*, vol. 96, no. 4, pp. 844–861, 2020, doi:  
361 10.1002/ccd.28990.
- 362 [7] S. Yan *et al.*, “The global survival rate among adult out-of-hospital cardiac arrest patients  
363 who received cardiopulmonary resuscitation: a systematic review and meta-analysis,” *Crit  
364 Care*, vol. 24, no. 1, p. 61, Feb. 2020, doi: 10.1186/s13054-020-2773-2.
- 365 [8] “Hüpfel: Chest-compression-only versus standard cardiopulm... - Google Scholar.”  
366 [https://scholar.google.com/scholar\\_lookup?title=Chest-compression-  
367 only%20versus%20standard%20cardiopulmonary%20resuscitation%3A%20a%20meta-  
368 analysis&journal=Lancet&doi=10.1016%2FS0140-6736%2810%2961454-  
369 7&volume=376&issue=9752&pages=1552-  
370 1557&publication\\_year=2010&author=Hupfl%2CM&author=Selig%2CHF&author=Nagele  
371 %20CP](https://scholar.google.com/scholar_lookup?title=Chest-compression-only%20versus%20standard%20cardiopulmonary%20resuscitation%3A%20a%20meta-analysis&journal=Lancet&doi=10.1016%2FS0140-6736%2810%2961454-7&volume=376&issue=9752&pages=1552-1557&publication_year=2010&author=Hupfl%2CM&author=Selig%2CHF&author=Nagele%20CP) (accessed Jan. 14, 2023).
- 372 [9] “Bystander Efforts and 1-Year Outcomes in Out-of-Hospital Cardiac Arrest | NEJM.”  
373 <https://www.nejm.org/doi/full/10.1056/NEJMoa1601891> (accessed Jan. 14, 2023).
- 374 [10] E. Andrew, Z. Nehme, M. Lijovic, S. Bernard, and K. Smith, “Outcomes following out-  
375 of-hospital cardiac arrest with an initial cardiac rhythm of asystole or pulseless electrical  
376 activity in Victoria, Australia,” *Resuscitation*, vol. 85, no. 11, pp. 1633–1639, Nov. 2014,  
377 doi: 10.1016/j.resuscitation.2014.07.015.
- 378 [11] S. Saarinen, A. Kämäräinen, T. Silfvast, A. Yli-Hankala, and I. Virkkunen, “Pulseless  
379 electrical activity and successful out-of-hospital resuscitation – long-term survival and  
380 quality of life: an observational cohort study,” *Scand J Trauma Resusc Emerg Med*, vol. 20,  
381 no. 1, p. 74, Oct. 2012, doi: 10.1186/1757-7241-20-74.

- 382 [12] A. Proclemer *et al.*, “Current practice in out-of-hospital cardiac arrest management: a  
383 european heart rhythm association EP network survey,” *EP Europace*, vol. 14, no. 8, pp.  
384 1195–1198, Aug. 2012, doi: 10.1093/europace/eus232.
- 385 [13] D. Zive *et al.*, “Variation in out-of-hospital cardiac arrest resuscitation and transport  
386 practices in the Resuscitation Outcomes Consortium: ROC Epistry–Cardiac Arrest,”  
387 *Resuscitation*, vol. 82, no. 3, pp. 277–284, Mar. 2011, doi:  
388 10.1016/j.resuscitation.2010.10.022.
- 389 [14] S. Masterson, C. Teljeur, J. Cullinan, A. W. Murphy, C. Deasy, and A. Vellinga, “Out-of-  
390 hospital cardiac arrest in the home: Can area characteristics identify at-risk communities in  
391 the Republic of Ireland?,” *International Journal of Health Geographics*, vol. 17, no. 1, p. 6,  
392 Feb. 2018, doi: 10.1186/s12942-018-0126-z.
- 393 [15] P. C. M. Homma *et al.*, “Transfer of essential AED information to treating hospital  
394 (TREAT),” *Resuscitation*, vol. 149, pp. 47–52, Apr. 2020, doi:  
395 10.1016/j.resuscitation.2020.01.033.
- 396 [16] R. A. Waalewijn, R. de Vos, and R. W. Koster, “Out-of-hospital cardiac arrests in  
397 Amsterdam and its surrounding areas: results from the Amsterdam resuscitation study  
398 (ARREST) in Utstein style.,” *Resuscitation*, vol. 38, no. 3, pp. 157–167, Sep. 1998, doi:  
399 10.1016/S0300-9572(98)00102-6.
- 400 [17] C. Hauw-Berlemont *et al.*, “Emergency vs Delayed Coronary Angiogram in Survivors of  
401 Out-of-Hospital Cardiac Arrest: Results of the Randomized, Multicentric EMERGE Trial,”  
402 *JAMA Cardiology*, vol. 7, no. 7, pp. 700–707, Jul. 2022, doi: 10.1001/jamacardio.2022.1416.
- 403 [18] K. B. Kern *et al.*, “Randomized Pilot Clinical Trial of Early Coronary Angiography  
404 Versus No Early Coronary Angiography After Cardiac Arrest Without ST-Segment  
405 Elevation: The PEARL Study,” *Circulation*, vol. 142, no. 21, pp. 2002–2012, Nov. 2020,  
406 doi: 10.1161/CIRCULATIONAHA.120.049569.

407

408

409

410

411

412

413

414

415

416

417

418 **Table 1.** Baseline characteristics of overall cohort

|                                    | Overall<br>(N=164) | EMS<br>Documented<br>Shockable<br>Rhythm<br>Concordant with<br>Hospital<br>Documentation<br>(N=34) | EMS<br>Documented<br>Shockable<br>Rhythm<br>Discordant with<br>Hospital<br>Documentation<br>(N=12) | EMS Documented<br>Non-Shockable<br>Rhythm<br>Concordant with<br>Hospital<br>Documentation<br>(N=106) | EMS Documented<br>Non-Shockable<br>Rhythm Discordant<br>with Hospital<br>Documentation<br>(N=12) |
|------------------------------------|--------------------|----------------------------------------------------------------------------------------------------|----------------------------------------------------------------------------------------------------|------------------------------------------------------------------------------------------------------|--------------------------------------------------------------------------------------------------|
| <b>Age, Mean (SD)</b>              | 62.7 (±15.4)       | 61.3 (±15.1)                                                                                       | 61.3 (±15.2)                                                                                       | 62.3 (±15.4)                                                                                         | 64.1 (±15.1)                                                                                     |
| <b>Gender, n (%)</b>               |                    |                                                                                                    |                                                                                                    |                                                                                                      |                                                                                                  |
| Female                             | 73 (44.5)          | 13 (38.2)                                                                                          | 3 (25)                                                                                             | 50 (47.2)                                                                                            | 7                                                                                                |
| <b>Race/Ethnicity, n (%)</b>       |                    |                                                                                                    |                                                                                                    |                                                                                                      |                                                                                                  |
| Black/African American             | 123 (75.0)         | 24 (70.6)                                                                                          | 8 (66.7)                                                                                           | 78 (73.6)                                                                                            | 11 (91.7)                                                                                        |
| White                              | 10 (6.1)           | 4 (11.8)                                                                                           | 1 (8.3)                                                                                            | 5 (4.7)                                                                                              | 1 (8.3)                                                                                          |
| Hispanic/Latino                    | 4 (2.4)            | 1 (2.9)                                                                                            | 0 (0)                                                                                              | 3 (2.8)                                                                                              | 0 (0)                                                                                            |
| Asian                              | 4 (2.4)            | 2 (5.9)                                                                                            | 0 (0)                                                                                              | 1 (0.9)                                                                                              | 0 (0)                                                                                            |
| American Indian/Alaskan            | 1 (0.61)           | 0 (0)                                                                                              | 0 (0)                                                                                              | 1 (0.9)                                                                                              | 0 (0)                                                                                            |
| Unknown                            | 22 (13.4)          | 3 (8.8)                                                                                            | 3 (25)                                                                                             | 18 (17.0)                                                                                            | 0 (0)                                                                                            |
| <b>Medical History, n (%)</b>      |                    |                                                                                                    |                                                                                                    |                                                                                                      |                                                                                                  |
| Hypertension                       | 49 (29.9)          | 9 (26.5)                                                                                           | 2 (16.7)                                                                                           | 35 (33.0)                                                                                            | 4 (33.3)                                                                                         |
| Diabetes                           | 29 (17.7)          | 2 (5.9)                                                                                            | 1 (8.3)                                                                                            | 19 (17.9)                                                                                            | 7 (58.3)                                                                                         |
| Heart Disease                      | 23 (14.0)          | 6 (17.6)                                                                                           | 0 (0)                                                                                              | 16 (15.1)                                                                                            | 1 (8.3)                                                                                          |
| Renal Disease                      | 14 (8.5)           | 1 (2.9)                                                                                            | 2 (16.7)                                                                                           | 9 (8.5)                                                                                              | 2 (16.7)                                                                                         |
| Respiratory Disorder               | 14 (8.5)           | 3 (8.8)                                                                                            | 0 (0)                                                                                              | 10 (9.4)                                                                                             | 1 (8.3)                                                                                          |
| Cancer                             | 5 (3.0)            | 0 (0)                                                                                              | 0 (0)                                                                                              | 5 (4.7)                                                                                              | 0 (0)                                                                                            |
| Unknown                            | 74 (45.1)          | 17 (50)                                                                                            | 7 (58.3)                                                                                           | 46 (43.4)                                                                                            | 7 (58.3)                                                                                         |
| <b>Cardiac Procedures, n (%)</b>   |                    |                                                                                                    |                                                                                                    |                                                                                                      |                                                                                                  |
| Left Heart Catheterization         | 29 (17.7)          | 18 (52.9)                                                                                          | 3 (25.0)                                                                                           | 5 (4.7)                                                                                              | 3 (25.0)                                                                                         |
| Right Heart Catheterization        | 15 (9.1)           | 9 (26.5)                                                                                           | 2 (16.7)                                                                                           | 3 (2.8)                                                                                              | 1 (8.3)                                                                                          |
| Percutaneous Coronary Intervention | 11 (6.7)           | 11 (32.4)                                                                                          | 0 (0)                                                                                              | 0 (0)                                                                                                | 0 (0)                                                                                            |

419

420

421 **Table 2.** Baseline characteristics by initially documented emergency medical services (EMS)  
 422 rhythm

|                                    | EMS Documented Shockable Rhythm (N=46) | EMS Documented Non-Shockable Rhythm (N=118) | 423<br>424 |
|------------------------------------|----------------------------------------|---------------------------------------------|------------|
| <b>Age, Mean (SD)</b>              | 61.2 (±15.0)                           | 62.63 (±15.51)                              | 425        |
| <b>Gender, n (%)</b>               |                                        |                                             | 426        |
| Female                             | 16 (34.8)                              | 57 (48.31)                                  |            |
| <b>Race/Ethnicity, n (%)</b>       |                                        |                                             | 427        |
| Black/African American             | 32 (69.57)                             | 91 (77.12)                                  | 428        |
| White                              | 4 (8.70)                               | 6 (5.08)                                    |            |
| Hispanic/Latino                    | 1 (2.17)                               | 3 (2.54)                                    | 429        |
| Asian                              | 3 (6.52)                               | 1 (0.85)                                    | 430        |
| American Indian/Alaskan            | 0 (0)                                  | 1 (0.85)                                    |            |
| Unknown                            | 6 (13.04)                              | 16 (13.56)                                  | 431        |
| <b>Medical History, n (%)</b>      |                                        |                                             | 432        |
| Hypertension                       | 11 (23.91)                             | 39 (33.05)                                  | 433        |
| Diabetes                           | 3 (6.52)                               | 26 (22.03)                                  |            |
| Heart Disease                      | 6 (13.04)                              | 17 (14.41)                                  | 434        |
| Renal Disease                      | 3 (6.52)                               | 11 (9.32)                                   | 435        |
| Respiratory Disorder               | 3 (6.52)                               | 11 (9.32)                                   |            |
| Cancer                             | 0 (0)                                  | 5 (4.24)                                    | 436        |
| Unknown                            | 15 (32.61)                             | 39 (33.05)                                  | 437        |
| <b>Cardiac Procedures, n (%)</b>   |                                        |                                             | 438        |
| Left Heart Catheterization         | 21 (45.65)                             | 8 (6.78)                                    | 439        |
| Right Heart Catheterization        | 11 (23.91)                             | 4 (3.39)                                    | 440        |
| Percutaneous Coronary Intervention | 11 (23.91)                             | 0 (0)                                       | 441        |

**Table 3.** Out-of-hospital cardiac arrest resuscitation traits

442 n characteristics by initially documented emergency medical services (EMS) rhythm

|                                                                   | EMS Documented Shockable Rhythm (N=46) | EMS Documented Non-Shockable Rhythm (N=118) |
|-------------------------------------------------------------------|----------------------------------------|---------------------------------------------|
| <b>Out-of-hospital cardiac arrest resuscitation traits, n (%)</b> |                                        |                                             |
| AED was not applied                                               | 26 (56.52)                             | 92 (77.97)                                  |
| AED was applied without defibrillation                            | 0 (0)                                  | 25 (21.19)                                  |



|                                                                                                                                                           |            |            |     |
|-----------------------------------------------------------------------------------------------------------------------------------------------------------|------------|------------|-----|
| AED was applied with defibrillation                                                                                                                       | 20 (43.48) | 1 (0.85)   | 443 |
| Use of a mechanical CPR support device                                                                                                                    | 7 (15.22)  | 44 (37.29) | 444 |
| CPR initiated by individual other than EMS personnel                                                                                                      | 20 (43.48) | 52 (44.07) | 445 |
| Arrest Unwitnessed                                                                                                                                        | 14 (30.43) | 45 (38.14) | 446 |
| <b>Electrocardiogram (ECG), n (%)</b>                                                                                                                     |            |            | 447 |
| 12 Lead ECG was obtained by EMS                                                                                                                           | 20 (43.48) | 43 (36.44) | 448 |
| STEMI is present on ECG obtained by EMS                                                                                                                   | 3 (6.52)   | 5 (4.24)   | 449 |
| Ischemic changes present on initial ECG obtained by hospital team*                                                                                        | 28 (60.87) | 49 (41.53) | 450 |
| AED=automated external defibrillator; CPR=cardiopulmonary resuscitation; EMS=emergency medical services; STEMI=ST-segment elevation myocardial infarction |            |            | 451 |
| *Ischemic changes were defined as ST segment elevations, ST segment depressions, or T wave inversions                                                     |            |            | 452 |

**Table 4.**

454 Influence of concordance and discordance on relative risk of cardiac procedures by initially  
 455 documented emergency medical services (EMS) rhythm

|                                                      | Initial EMS shockable rhythm comparing hospital concordance vs. discordance | Initial EMS non-shockable rhythm comparing hospital concordance vs. discordance |
|------------------------------------------------------|-----------------------------------------------------------------------------|---------------------------------------------------------------------------------|
| Left Heart Catheterization Relative Risk Ratio (CI)  | 2.12 (0.76-5.93)                                                            | 0.19 (0.05-0.69)                                                                |
| Right Heart Catheterization Relative Risk Ratio (CI) | 1.59 (0.40-6.33)                                                            | 0.34 (0.04-3.01)                                                                |

456  
 457  
 458  
 459  
 460  
 461

462  
463  
464  
465  
466  
467  
468  
469  
470  
471

472 **Table 5.** Influence of concordance and discordance on relative risk of cardiac procedures by  
473 presence of ischemic changes on initial ECG obtained by the hospital team, regardless of initial  
474 documented EMS rhythm

|                                                                 | <b>Ischemic changes present on initial ECG obtained by hospital team (N=77)</b> |
|-----------------------------------------------------------------|---------------------------------------------------------------------------------|
| <b>Left Heart Catheterization Relative Risk Ratio (95% CI)</b>  | 2.48 (1.20-5.12)                                                                |
| <b>Right Heart Catheterization Relative Risk Ratio (95% CI)</b> | 1.28 (0.49-3.36)                                                                |
| <b>Percutaneous Coronary Intervention (95% CI)</b>              | 11.17 (1.46-85.25)                                                              |

475  
476  
477  
478  
479

480

481

482

483

484

485

486

487

488

489

490 **Figure 1.** Assembly of cohort and impact of incorrect documentation of initial cardiac rhythm,

491 stratified by initially documented EMS rhythm

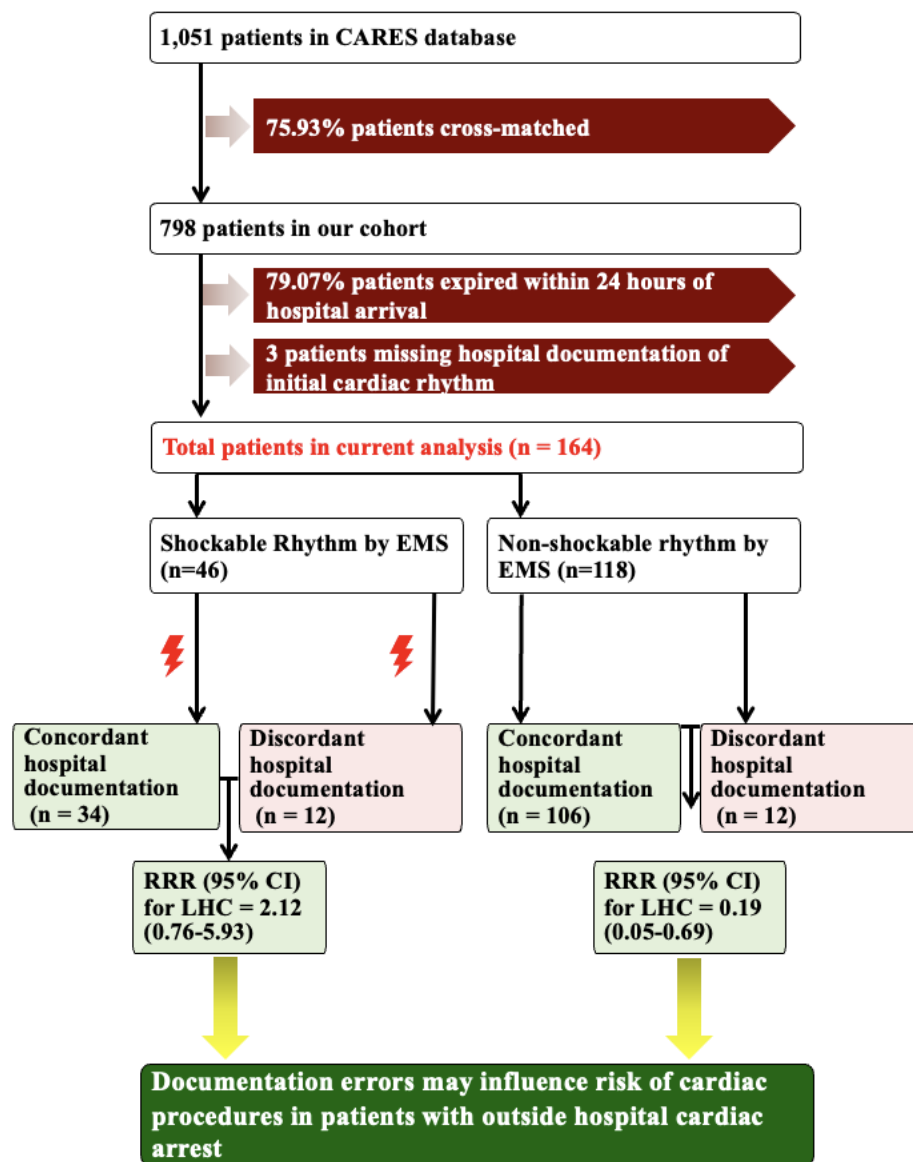

**Figure 1.** Flow chart displaying assembly of cohort and potential impact of discordance between EMS and hospital documentation of initial cardiac rhythm. Abbreviations: EMS = emergency medical services; RRR = relative risk ratio; CI = confidence interval; LHC = Left heart catheterization

492

493 **Figure Legend.** Flow chart displaying assembly of cohort and potential impact of discordance

494 between EMS and hospital documentation of initial cardiac rhythm, stratified by EMS

495 documentation of initial cardiac rhythm. Abbreviations: EMS = emergency medical serves; RRR

496 = relative risk ratio; CI = confidence interval; LHC = Left heart catheterization

497
